# Supplementary material
Source: Springer Nature journal article supplement (https://www.springermedizin.de/resource/supplementary/12891_2014_2397_MOESM1_ESM.pdf/9510110)
Supplement: MOESM1 [file 9510110]

**Additional file 1. HBV serological markers for each patient both at baseline and at the end of follow-up\***

| Characteristics                         | Patient 1            | Patient 2            | Patient 3            | Patient 4            | Patient 5            | Patient 6            | Patient 7            | Patient 8            | Patient 9            | Patient 10           | Patient 11           | Patient 12           | Patient 13           |
|-----------------------------------------|----------------------|----------------------|----------------------|----------------------|----------------------|----------------------|----------------------|----------------------|----------------------|----------------------|----------------------|----------------------|----------------------|
| HBsAg, baseline/ at reactivation        | +/+                  | +/+                  | +/+                  | +/+                  | +/+                  | +/+                  | +/+                  | +/+                  | +/+                  | +/+                  | +/+                  | +/+                  | +/+                  |
| HBsAb, baseline/ at reactivation        | -/-                  | -/-                  | -/-                  | -/-                  | -/-                  | -/-                  | -/-                  | -/-                  | -/-                  | -/-                  | -/-                  | -/-                  | -/-                  |
| HBeAg, baseline/ at reactivation        | -/-                  | -/-                  | -/-                  | -/-                  | -/-                  | -/-                  | +/+                  | -/-                  | -/-                  | -/-                  | +/+                  | +/+                  | -/-                  |
| HBeAb, baseline/ at reactivation        | +/+                  | +/+                  | +/+                  | +/+                  | +/+                  | +/+                  | -/-                  | +/+                  | +/+                  | +/+                  | -/-                  | -/-                  | +/+                  |
| HBcAb, baseline/ at reactivation        | +/+                  | +/+                  | +/+                  | +/+                  | +/+                  | +/+                  | +/+                  | +/+                  | +/+                  | +/+                  | +/+                  | +/+                  | +/+                  |
| Viral loads at baseline (Copies/mL)     | <10 <sup>3</sup>     | <10 <sup>3</sup>     | <10 <sup>3</sup>     | 1.0×10 <sup>3</sup>  | <10 <sup>3</sup>     | <10 <sup>3</sup>     | <10 <sup>3</sup>     | <10 <sup>3</sup>     | 7.03×10 <sup>3</sup> | 1.22×10 <sup>3</sup> | 3.18×10 <sup>5</sup> | <10 <sup>3</sup>     | 1.0×10 <sup>3</sup>  |
| Viral loads at reactivation (Copies/mL) | 3.64×10 <sup>5</sup> | 7.87×10 <sup>3</sup> | 1.92×10 <sup>3</sup> | 2.47×10 <sup>4</sup> | 6.98×10 <sup>3</sup> | 1.15×10 <sup>4</sup> | 3.01×10 <sup>3</sup> | 4.01×10 <sup>3</sup> | 9.91×10 <sup>5</sup> | 1.41×10 <sup>7</sup> | 1.78×10 <sup>8</sup> | 5.26×10 <sup>7</sup> | 1.59×10 <sup>7</sup> |

| Characteristics                                 | Patient 14       | Patient 15       | Patient 16       | Patient 17       | Patient 18       | Patient 19       | Patient 20       | Patient 21       | Patient 22       | Patient 23       | Patient 24       | Patient 25       |
|-------------------------------------------------|------------------|------------------|------------------|------------------|------------------|------------------|------------------|------------------|------------------|------------------|------------------|------------------|
| HBsAg, baseline/ at the end of follow-up        | +/+              | +/+              | +/+              | +/+              | +/+              | +/+              | +/+              | +/+              | +/+              | +/+              | +/+              | +/+              |
| HBsAb, baseline/ at the end of follow-up        | -/-              | -/-              | -/-              | -/-              | -/-              | -/-              | -/-              | -/-              | -/-              | -/-              | -/-              | -/-              |
| HBeAg, baseline/ at the end of follow-up        | -/-              | -/-              | -/-              | -/-              | -/-              | -/-              | -/-              | -/-              | -/-              | -/-              | -/-              | -/-              |
| HBeAb, baseline/ at the end of follow-up        | +/+              | +/+              | +/+              | +/+              | +/+              | +/+              | +/+              | +/+              | +/+              | +/+              | +/+              | +/+              |
| HBcAb, baseline/ at the end of follow-up        | +/+              | +/+              | +/+              | +/+              | +/+              | +/+              | +/+              | +/+              | +/+              | +/+              | +/+              | +/+              |
| Viral loads at baseline (Copies/mL)             | <10 <sup>3</sup> | <10 <sup>3</sup> | <10 <sup>3</sup> | <10 <sup>3</sup> | <10 <sup>3</sup> | <10 <sup>3</sup> | <10 <sup>3</sup> | <10 <sup>3</sup> | <10 <sup>3</sup> | <10 <sup>3</sup> | <10 <sup>3</sup> | <10 <sup>3</sup> |
| Viral loads at the end of follow-up (Copies/mL) | <10 <sup>3</sup> | <10 <sup>3</sup> | <10 <sup>3</sup> | <10 <sup>3</sup> | <10 <sup>3</sup> | <10 <sup>3</sup> | <10 <sup>3</sup> | <10 <sup>3</sup> | <10 <sup>3</sup> | <10 <sup>3</sup> | <10 <sup>3</sup> | <10 <sup>3</sup> |

| Characteristics                                 | Patient 26           | Patient 27           | Patient 28           | Patient 29           | Patient 30           | Patient 31           | Patient 32           | Patient 33           | Patient 34           | Patient 35           | Patient 36           |
|-------------------------------------------------|----------------------|----------------------|----------------------|----------------------|----------------------|----------------------|----------------------|----------------------|----------------------|----------------------|----------------------|
| HBsAg, baseline/ at the end of follow-up        | +/+                  | +/+                  | +/+                  | +/+                  | +/+                  | +/+                  | +/+                  | +/+                  | +/+                  | +/+                  | +/+                  |
| HBsAb, baseline/ at the end of follow-up        | -/-                  | -/-                  | -/-                  | -/-                  | -/-                  | -/-                  | -/-                  | -/-                  | -/-                  | -/-                  | -/-                  |
| HBeAg, baseline/ at the end of follow-up        | +/+                  | +/+                  | +/+                  | -/-                  | -/-                  | +/+                  | -/-                  | -/-                  | -/-                  | -/-                  | -/-                  |
| HBeAb, baseline/ at the end of follow-up        | -/-                  | -/-                  | -/-                  | +/+                  | +/+                  | -/-                  | +/+                  | +/+                  | +/+                  | +/+                  | +/+                  |
| HBcAb, baseline/ at the end of follow-up        | +/+                  | +/+                  | +/+                  | +/+                  | +/+                  | +/+                  | +/+                  | +/+                  | +/+                  | +/+                  | +/+                  |
| Viral loads at baseline (Copies/mL)             | 1.51×10 <sup>8</sup> | 6.06×10 <sup>7</sup> | 8.89×10 <sup>6</sup> | 3.94×10 <sup>5</sup> | 1.71×10 <sup>5</sup> | 1.39×10 <sup>5</sup> | 7.04×10 <sup>4</sup> | 1.33×10 <sup>4</sup> | 6.31×10 <sup>3</sup> | 4.01×10 <sup>3</sup> | 2.0×10 <sup>3</sup>  |
| Viral loads at the end of follow-up (Copies/mL) | 6.99×10 <sup>7</sup> | 5.54×10 <sup>5</sup> | 6.78×10 <sup>4</sup> | 3.54×10 <sup>4</sup> | <5.0×10 <sup>2</sup> | 6.72×10 <sup>4</sup> | 5.12×10 <sup>4</sup> | 5.0×10 <sup>2</sup>  | 4.79×10 <sup>3</sup> | <5.0×10 <sup>2</sup> | 2.18×10 <sup>3</sup> |

\* The major endpoint of this study was HBV reactivation. For patient 1~13 who developed HBV reactivation, “at the end of follow-up” was equal to “at reactivation”.
